# Supplementary material for: Enhanced DPPH Radical Scavenging Activity and Enriched γ-Aminobutyric Acid in Mulberry Juice Fermented by the Probiotic Lactobacillus brevis S3
Source: MDPI journal article supplement (doi:10.3390/fermentation9090829), 2023-09-11
Supplement: s1 [file s1]

Supplemental material

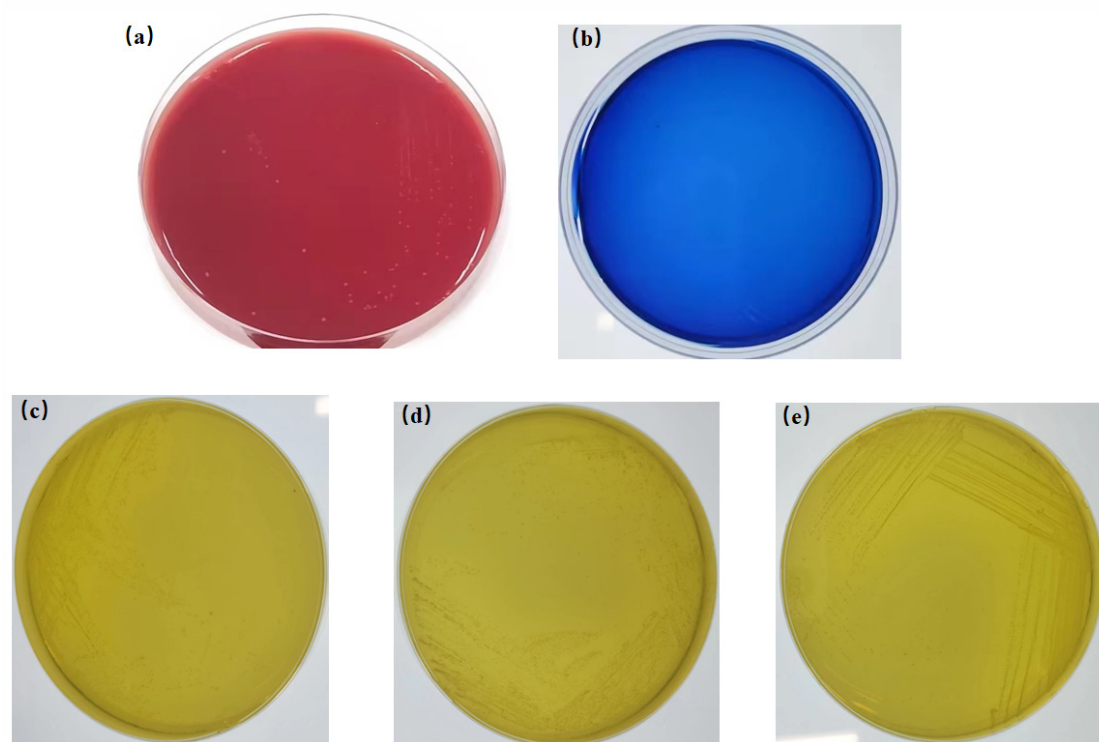

Figure S1. (a) Hemolysis test, (b) DNase production and (c) Biogenic amine production of (c) arginine, (d) lysine and (e) histidine for *Lactobacillus brevis* S3.
