# Supplementary material for: Enhanced DPPH Radical Scavenging Activity and Enriched γ-Aminobutyric Acid in Mulberry Juice Fermented by the Probiotic Lactobacillus brevis S3
Source: MDPI journal article supplement (doi:10.3390/fermentation9090829), 2023-09-11
Supplement: s1 [file s1]

Archive with 1 entries (1 files):
- fermentation-2561162-supplementary.pdf
